# Supplementary material
Source: publisher figshare collection journal article supplement (https://acs.figshare.com/ndownloader/files/24917221)
Supplement: Supplementary file 1 [file 24917221]

# Supporting Information

## **Molecular Cobalt Catalysts for O<sub>2</sub> Reduction to H<sub>2</sub>O<sub>2</sub>: Benchmarking Catalyst Performance via Rate–Overpotential Correlations**

Yu-Heng Wang,<sup>‡</sup> Biswajit Mondal, and Shannon S. Stahl\*

Department of Chemistry, University of Wisconsin–Madison, Madison, Wisconsin 53706, USA

\*Corresponding Author: stahl@chem.wisc.edu.

<sup>‡</sup>Current Address: Y. H. W.: Department of Chemistry, National Tsing Hua University, Hsinchu 30013, Taiwan.

### **Table of Contents**

|                                                                                                                         |     |
|-------------------------------------------------------------------------------------------------------------------------|-----|
| I. General considerations .....                                                                                         | S2  |
| II. OCP measurements of $E_{\text{H}^+/\text{H}_2}$ using literature conditions .....                                   | S2  |
| III. Estimation of $E_{\text{O}_2/\text{H}_2\text{O}_2}$ based on the literature conditions.....                        | S4  |
| IV. Electrochemical experiments .....                                                                                   | S4  |
| V. Turnover frequencies of ORR catalyzed by 1–8 .....                                                                   | S6  |
| VI. Selectivity of ORR catalyzed by 1–8 .....                                                                           | S9  |
| VII. Turnover frequencies and effective overpotentials for Co(por), Co(N <sub>2</sub> O <sub>2</sub> ), and Fe(por) ... | S11 |
| VIII. Turnover frequencies of previous O <sub>2</sub> reduction studies .....                                           | S13 |
| IX. Effective overpotentials of previous O <sub>2</sub> reduction studies .....                                         | S16 |
| X. Relationship between log(TOF) and $E_{1/2}(\text{Co})$ .....                                                         | S18 |
| XI. References .....                                                                                                    | S19 |

## I. General considerations

All commercially available reagents and solvents were used as received, except where otherwise noted. Perchloric acid (70%) was obtained from Sigma Aldrich. UV-Vis spectra were recorded on an Agilent Cary 60 spectrometer.

## II. OCP measurements of $E_{\text{H}^+/\text{H}_2}$ using literature conditions

**A. Open-circuit potential (OCP) measurements for  $E_{\text{H}^+/\text{H}_2}$  with different buffered conditions.** The  $\text{H}^+/\text{H}_2$  potential in organic media can be determined through open-circuit potential measurements at a Pt electrode using a recently reported protocol.<sup>1</sup> The  $\text{H}^+/\text{H}_2$  potentials were measured for DMF with various buffered conditions under 1 atm  $\text{H}_2$  (local atmospheric pressure of 752 mm Hg, correction to 1 atm < 1 mV). All DMF solutions were containing 0.1 M  $[\text{NBu}_4][\text{ClO}_4]$  as supporting electrolyte. These conditions were chosen to give media that have stable, well-defined thermodynamics for the  $\text{H}^+/\text{H}_2$  equilibria. Stable open-circuit potentials of  $\text{H}^+/\text{H}_2$  ( $E_{\text{H}^+/\text{H}_2}$ ) were observed, and  $E_{\text{H}^+/\text{H}_2}$  were referenced to  $\text{Fc}^{*+/0}$  by adding decamethylferrocene and performing CV at a second, glassy carbon working electrode in the same solution (Figure S1).

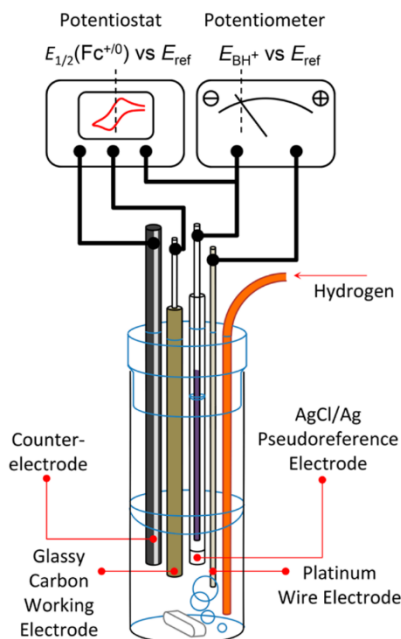

**Figure S1.** Schematic of the four-electrode cell configuration used for open circuit potential (OCP) measurements.<sup>1</sup> The reduction potential of  $\text{H}^+/\text{H}_2$  was measured for DMF solutions with various buffered conditions under 1 atm  $\text{H}_2$ . All DMF solutions were containing 0.1 M  $[\text{NBu}_4\text{ClO}_4]$  as supporting electrolyte (Figure S1 is reproduced from ref. 1; copyright 2013 American Chemical Society.)

**B.** Homogeneous  $\text{O}_2$  reduction catalyzed by monomeric Co complexes in the literature were conducted in aqueous or organic solutions. To estimate the thermodynamic reduction potentials of  $\text{O}_2/\text{H}_2\text{O}_2$  ( $E_{\text{O}_2/\text{H}_2\text{O}_2}$ ) of that ORR conducted in organic solutions, the OCP measurements of  $E_{\text{H}^+/\text{H}_2}$  were performed to estimate  $E_{\text{O}_2/\text{H}_2\text{O}_2}$  under different reaction conditions (Figures S2 and S3). In additions, corresponding buffered conditions are used for all OCP measurements of  $E_{\text{H}^+/\text{H}_2}$ . Buffered conditions are used because the presence of "buffer" ensures that there are only negligible changes in the proton concentration during the OCP measurements of  $E_{\text{H}^+/\text{H}_2}$ . All reported  $E_{\text{H}^+/\text{H}_2}$  are relative to the  $\text{Fc}^{*+/0}$ .

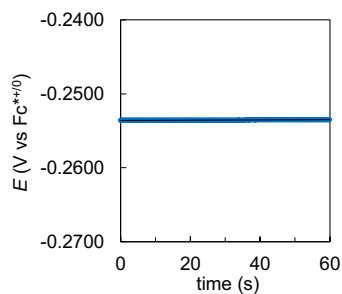

**Figure S2.** The black traces show the average OCP of  $E_{H^+/H_2}$  with 10 mM  $\text{HClO}_4$  in DMF under 1 atm  $\text{H}_2$ .  $E_{H^+/H_2} \approx -0.25$  V vs.  $\text{Fc}^{*+/0}$ . Supporting electrolyte: 0.1 M  $[\text{NBu}_4\text{ClO}_4]$ .

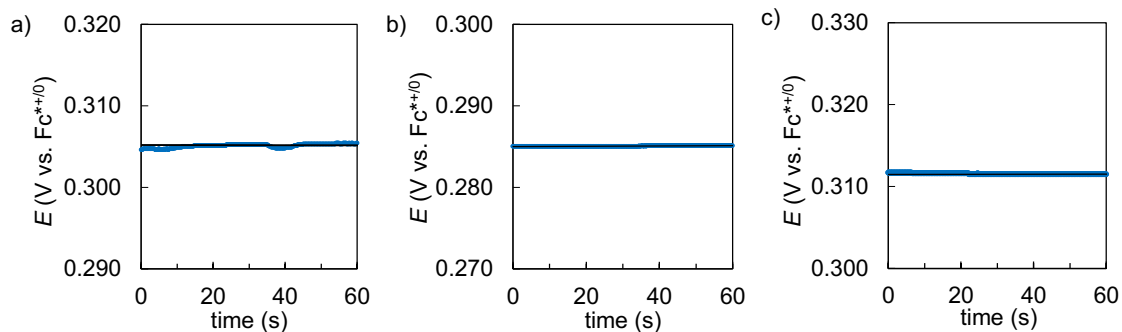

**Figure S3.** The OCP measurements of  $E_{H^+/H_2}$  under 1 atm  $\text{H}_2$  for different conditions: (a) 20 mM  $\text{HClO}_4$  in MeCN;<sup>2</sup> (b) 20 mM each of  $\text{HClO}_4$  in PhCN;<sup>3,4</sup> (c) 50 mM  $\text{HClO}_4$  in PhCN.<sup>5,6</sup> Supporting electrolyte: 0.1 M  $[\text{NBu}_4\text{ClO}_4]$ .

### III. Estimation of $E_{O_2/H_2O_2}$ based on the literature conditions

#### A. Estimation of $E_{O_2/H_2O_2}$ based on $E_{H^+/H_2}$ measured by OCP.<sup>7</sup>

The reduction potential for  $O_2/H_2O_2$  in DMF may be estimated using i) the standard aqueous cell potential for  $O_2 + H_2 \rightarrow H_2O_2$ , ii) the measurement of the open circuit potential (OCP) for  $H^+/H_2$  ( $E_{H^+/H_2}$ ) (cf. Figure S2), and iii) the Gibbs free energy to transfer  $H_2O_2$  from  $H_2O$  to DMF.<sup>8,9</sup> For instance,  $E_{O_2/H_2O_2}$  for the DMF solution in the presence of 10 mM each of  $HClO_4$  and  $[NBu_4][ClO_4]$  is calculated by the following equations:

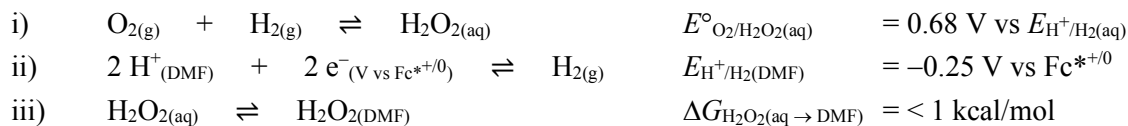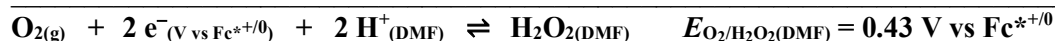

**Table S1.** A summary of reduction potentials of  $H^+/H_2$  and  $O_2/H_2O_2$  under organic conditions in the literature. All potentials are relative to the  $Fc^{*/0}$ .

|                    | DMF,<br>10 mM $HClO_4^a$ | MeCN,<br>20 mM $HClO_4$ | PhCN,<br>20 mM $HClO_4$ | PhCN,<br>50 mM $HClO_4$ |
|--------------------|--------------------------|-------------------------|-------------------------|-------------------------|
| $E_{H^+/H_2}$      | -0.25 V                  | 0.31 V                  | 0.29 V                  | 0.31 V                  |
| $E_{O_2/H_2O_2}^b$ | 0.43 V                   | 0.99 V                  | 0.97 V                  | 0.99 V                  |

<sup>a</sup>Reaction condition for this study. <sup>b</sup>At the standard-state condition of 1 M  $H_2O_2$ ,  $E_{O_2/H_2O_2} = E_{H^+/H_2} + 0.68 \text{ V}$ .

#### B. A thermodynamic reduction potential of $E_{O_2/H_2O_2}$ under standard state conditions

The oxygen reduction catalyzed by **1–8** were conducted in the presence of 100  $\mu\text{M}$  urea- $H_2O_2$  to establish a stable thermodynamic reference state for the effective overpotential. Because previous studies of catalytic ORR typically do not include a background concentration of  $H_2O_2$  in the reaction medium, we elected not to use this reference state in the effective overpotentials reported here to ensure that all catalysts were treated the same way. Hence, the effective overpotentials were calculated by assuming the reactions were performed under standard-state conditions for the entire study (i.e., 1 M  $H_2O_2$ ). At standard-state conditions, the thermodynamic reduction potential of  $E_{O_2/H_2O_2}$  under our catalytic conditions is calculated to be 0.43 V.

### IV. Electrochemical experiments

#### A. General considerations for cyclic voltammetry (CV).

All CV experiments were performed with a CH Instrument 600E Potentiostat at room temperature. The supporting electrolyte for all electrochemical experiments was 0.1 M tetrabutylammonium perchlorate ( $[NBu_4][ClO_4]$ ). The three-electrode setup for all cyclic voltammogram measurements included a glassy carbon (GC) working electrode (3.0 mm diameter), a platinum (Pt) wire counter electrode, and a 0.01 M  $Ag/AgNO_3$  non-aqueous reference electrode.

#### B. Cyclic Voltammograms of **1–8** in DMF.

1. The half-wave potentials of Co(por) complexes **1–8** ( $E_{1/2}(\text{Co}^{III/II})$ ) were recorded both in the absence and presence of 10 mM  $HClO_4$ . Half-wave potentials were recorded under buffered conditions because the catalytic rates of  $O_2$  reduction were measured under buffered conditions (*vide infra*). Therefore, the  $E_{1/2}(\text{Co}^{III/II})$  used to calculate the effective overpotentials in this study (cf. eq 3 in the main manuscript)



reflects the actual  $E_{1/2}(\text{Co}^{\text{III/II}})$  under catalytic conditions, which ensures effective overpotential are calculated correctly.

2. Buffered conditions are used in the catalytic reaction because protons are consumed in the catalytic reaction, and the presence of "buffer" ensures that there are only negligible changes in the proton concentration (cf. Section V).

**Chart S1.** Molecular Co(por) complexes **1–8** in this study

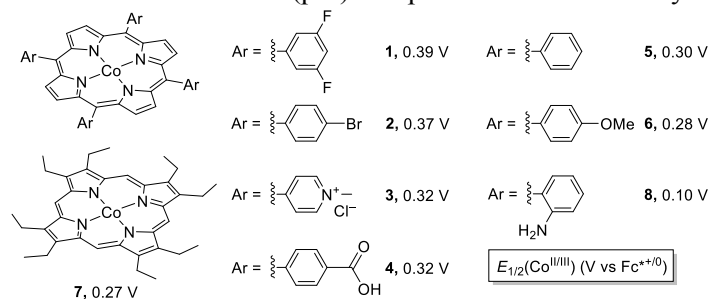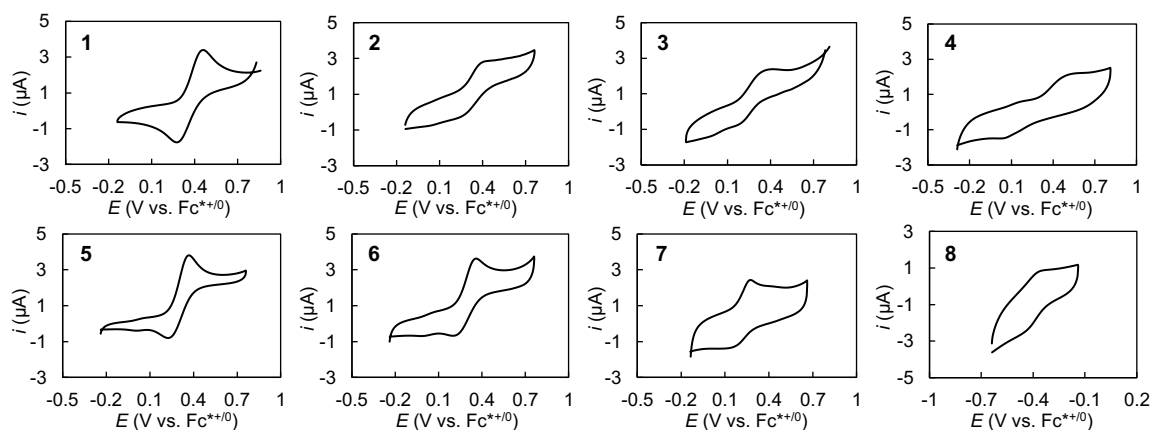

**Figure S4.** Cyclic voltammograms of 1 mM **1–8** in DMF solutions. All CVs were recorded under 1 atm  $\text{N}_2$  at the scan rate of 10 mV/s, and all  $E_{1/2}(\text{Co}^{\text{III/II}})$  are relative to the  $\text{Fc}^{+/0}$ .

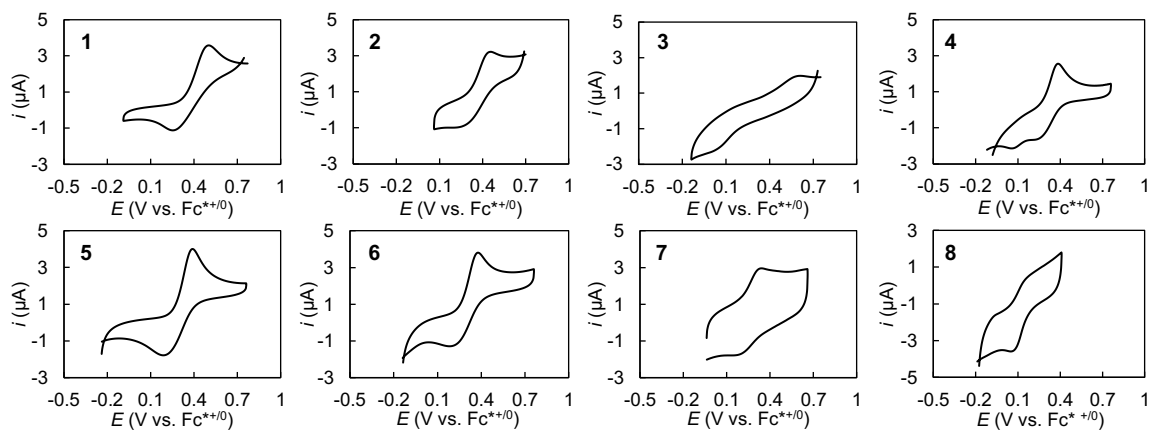

**Figure S5.** Cyclic voltammograms of 1 mM **1–8** in DMF solutions containing of 10 mM  $\text{HClO}_4$ . All CVs were recorded under 1 atm  $\text{N}_2$  at the scan rate of 10 mV/s, and all  $E_{1/2}(\text{Co}^{\text{III/II}})$  are relative to the  $\text{Fc}^{+/0}$ .

**Table S2.** A summary of  $E_{1/2}(\text{Co}^{\text{III/II}})$  of **1–8** in the absence and presence of 10 mM each of  $\text{HClO}_4$  and  $[\text{NBu}_4][\text{ClO}_4]$ . All  $E_{1/2}(\text{Co}^{\text{III/II}})$  are relative to the  $\text{Fc}^{*/0}$ .

| $E_{1/2}$ (V)                                      | 1    | 2    | 3    | 4    | 5    | 6    | 7    | 8     |
|----------------------------------------------------|------|------|------|------|------|------|------|-------|
| Conditions                                         |      |      |      |      |      |      |      |       |
| 0 mM $\text{HClO}_4/[\text{NBu}_4][\text{ClO}_4]$  | 0.40 | 0.38 | 0.29 | 0.29 | 0.30 | 0.29 | 0.22 | -0.42 |
| 10 mM $\text{HClO}_4/[\text{NBu}_4][\text{ClO}_4]$ | 0.39 | 0.37 | 0.32 | 0.32 | 0.30 | 0.28 | 0.26 | 0.10  |

**Table S3.** A summary of effective overpotentials ( $\eta_{\text{eff}}$ , V) for the  $\text{O}_2$  reduction catalyzed by **1–8**.<sup>a,b</sup>

| Co(por)                                                          | 1    | 2    | 3    | 4    | 5    | 6    | 7    | 8    |
|------------------------------------------------------------------|------|------|------|------|------|------|------|------|
| $\eta_{\text{eff}}$ (V) at standard state condition <sup>c</sup> | 0.04 | 0.06 | 0.11 | 0.11 | 0.13 | 0.15 | 0.17 | 0.33 |

<sup>a</sup> Buffered conditions: 10 mM each of  $\text{HClO}_4$  and  $[\text{NBu}_4][\text{ClO}_4]$ . <sup>b</sup>  $\eta_{\text{eff}} = E_{\text{O}_2/\text{H}_2\text{O}_2} - E_{1/2}(\text{Co}^{\text{III/II}})$ ,  $E_{\text{O}_2/\text{H}_2\text{O}_2} = 0.43$  V vs.  $\text{Fc}^{*/0}$  (section III). <sup>c</sup> The effective overpotentials at standard state conditions were used for Figures 2, 5 and 6 in the main manuscript.

## V. Turnover frequencies of ORR catalyzed by **1–8**

### A. General considerations for kinetic studies of $\text{O}_2$ reduction catalyzed by **1–8**.

1. Catalytic  $\text{O}_2$  reduction was followed by UV-visible spectroscopy at 780 nm, where an increase in absorption is observed due to the formation of  $\text{Fc}^{*+}$ .<sup>10</sup> A background concentration of 100  $\mu\text{M}$  urea- $\text{H}_2\text{O}_2$  was added each of the reaction mixture to establish a stable thermodynamic reference state. This  $10^4$ -fold difference in  $[\text{H}_2\text{O}_2]$  compared to the standard state conditions (1 M  $\text{H}_2\text{O}_2$ ) formally would correspond to a 120 mV Nernstian shift in the thermodynamic  $\text{O}_2/\text{H}_2\text{O}_2$  potential (cf. Section III). Control experiments showed that neither the presence of urea nor the presence of urea- $\text{H}_2\text{O}_2$  in the reaction mixture influences the reaction rate.

2. Each catalytic experiment was conducted under buffered conditions. Because protons are consumed in the catalytic reduction of  $\text{O}_2$ , and the presence of "buffer" ensures that there are not large changes in the proton concentration during the course of the catalytic reaction. In addition, buffered conditions are crucial to establish a stable thermodynamic reduction potential for  $\text{O}_2/\text{H}_2\text{O}_2$  under the reaction conditions (cf. Sections I–II).

### B. Experimental protocol for catalytic $\text{O}_2$ to $\text{H}_2\text{O}_2$ by **1–8**.

A 2.7 mL DMF solution of 1.1 mM  $\text{Fc}^*$ , 110  $\mu\text{M}$  urea- $\text{H}_2\text{O}_2$ , and 11 mM  $[\text{NBu}_4][\text{ClO}_4]$  was vigorously sparged with  $\text{O}_2$  for 3 minutes to prepare the  $\text{O}_2$ -saturated solution. A 0.3 mL  $\text{N}_2$ -saturated DMF solution containing the cobalt complex being investigated (**1–8**, 0.1–100  $\mu\text{M}$ ) and 100 mM  $\text{HClO}_4$  was rapidly injected into the  $\text{O}_2$ -saturated DMF solution. The reaction mixture was then vigorously shaken for 20 sec and the absorbance was monitored at 780 nm by UV-visible spectroscopy. The final concentration of each of the components in the reaction mixture is as follows: 1 mM  $\text{Fc}^*$ , 0.01–10  $\mu\text{M}$  **1–8**, 10 mM each of  $\text{HClO}_4$  and  $[\text{NBu}_4][\text{ClO}_4]$ , 100  $\mu\text{M}$  urea- $\text{H}_2\text{O}_2$ , and 4.5 mM  $\text{O}_2$ .<sup>11</sup>

### C. Calculations of turnover frequencies (TOFs).

Background  $\text{O}_2$  reduction by  $\text{Fc}^*$  was observed in the absence of **1–8** under the experimental conditions (Figure S6, gray traces),<sup>12</sup> and the rate of this background reaction was subtracted from the initial rates obtained from the reactions conducted in the presence of catalysts (Figure S7). Initial rates, in units of  $\text{mM}\cdot\text{s}^{-1}$ , were obtained by fitting UV-visible time-course data with linear regression during the first ~5% of the reaction, as shown by insets in the plots below (Figure S7). The turnover frequencies (TOFs,  $\text{s}^{-1}$ ) were

then determined by dividing the number of electron transferred (to account for the conversion of O<sub>2</sub> to H<sub>2</sub>O<sub>2</sub> or H<sub>2</sub>O on the basis of consumption of single-electron reductant, Fc<sup>\*</sup>) and the catalyst concentration (TOF (s<sup>-1</sup>) =  $\frac{\Delta[\text{Fc}^*]/2}{[\text{Co}]\times\text{time}}$ ).

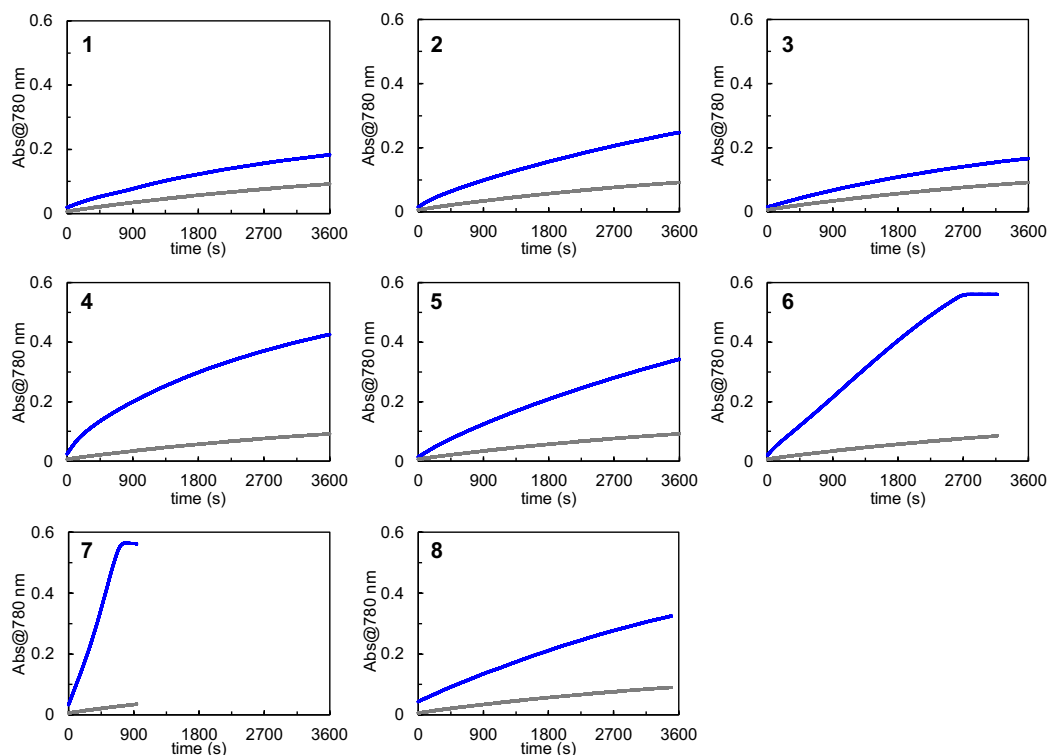

**Figure S6.** UV-visible time-course raw data for the catalytic O<sub>2</sub> reduction. Blue trace: the formation of Fc<sup>\*+</sup> due to the catalytic O<sub>2</sub> reduction and the background O<sub>2</sub> reduction by Fc<sup>\*</sup>; gray trace: the formation of Fc<sup>\*+</sup> due to the background O<sub>2</sub> reduction by Fc<sup>\*</sup> (in the absence of Co catalysts). Concentration of Co complexes **1–8** for each study: **1**, 10 μM; **2**, 10 μM; **3**, 1 μM; **4**, 10 μM; **5**, 2 μM; **6**, 2 μM; **7**, 2.5 μM; **8**, 0.01 μM.

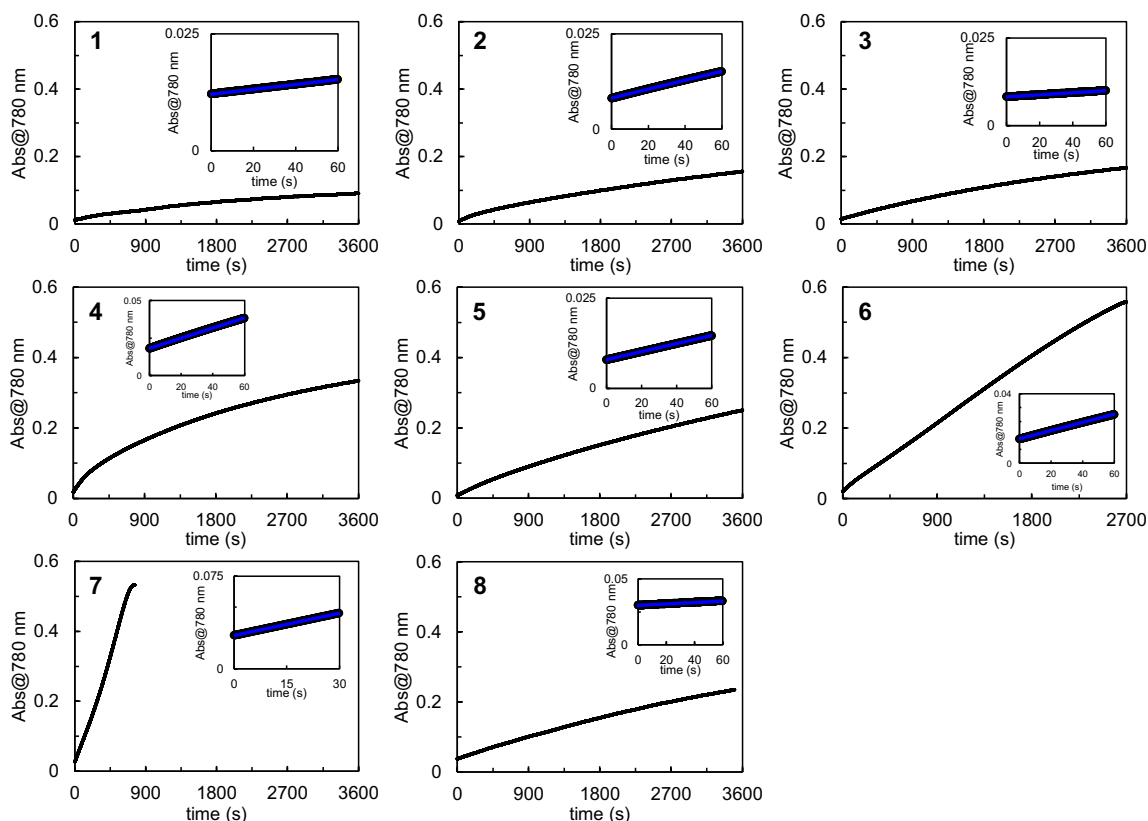

**Figure S7.** UV-visible time-course data for O<sub>2</sub> reduction catalyzed by complexes **1–8** that provide the basis for the TOFs associated with the complexes in Figure 3 of the main manuscript. Black trace: the O<sub>2</sub> reduction catalyzed by complexes **1–8**, which are obtained by subtracting the grey trace from the blue trace in Figure S4a. Concentration of Co complexes **1–8** for each study: **1**, 10 μM; **2**, 10 μM; **3**, 1 μM; **4**, 10 μM; **5**, 2 μM; **6**, 2 μM; **7**, 2.5 μM; **8**, 0.01 μM. Insets: the data points are fitted with linear regression to calculate the initial rates.

Initial rates of O<sub>2</sub> reduction (mM/s) = initial rate of Δ[Fc\*]/(2 × time)

Turnover frequency (TOF) for O<sub>2</sub> reduction (s<sup>-1</sup>) = initial rate of O<sub>2</sub> reduction/[Co].

**Table S4.** A summary of turnover frequencies (TOF, s<sup>-1</sup>) for the O<sub>2</sub> reduction catalyzed by **1–8**.<sup>a</sup>

| Co(por)                | <b>1</b> | <b>2</b> | <b>3</b> | <b>4</b> | <b>5</b> | <b>6</b> | <b>7</b> | <b>8</b> |
|------------------------|----------|----------|----------|----------|----------|----------|----------|----------|
| TOF (s <sup>-1</sup> ) | 0.0052   | 0.012    | 0.015    | 0.034    | 0.056    | 0.12     | 0.24     | 7.5      |

<sup>a</sup> Buffered conditions: 10 mM each of HClO<sub>4</sub> and [NBu<sub>4</sub>][ClO<sub>4</sub>].

## VI. Selectivity of ORR catalyzed by 1–8

### A. $\text{Ti}^{\text{IV}}(\text{O})\text{SO}_4$ colorimetric assay for $\text{H}_2\text{O}_2$ Quantification.

The first method for  $\text{H}_2\text{O}_2$  quantification used was a colorimetric assay using aqueous  $\text{Ti}^{\text{IV}}(\text{O})\text{SO}_4$ , modified from a literature procedure.<sup>13,14</sup> A calibration curve was constructed by first preparing a series of 10 mL DMF solutions with various concentrations of urea- $\text{H}_2\text{O}_2$  (0.05, 0.10, 0.15, 0.20, and 0.25 mM). A 0.1 mL solution of  $\text{Ti}^{\text{IV}}(\text{O})\text{SO}_4$  was added to the above solutions, respectively. The absorbance at 407 nm was measured by UV-visible spectroscopy to create the calibration curve as shown in Figure S8.

To quantify  $\text{H}_2\text{O}_2$  in the catalytic reaction mixture, a 0.5 mL aliquot of the catalytic reaction (cf. Section V) was vigorously mixed with 2 mL deionized  $\text{H}_2\text{O}$  and 5 mL dichloromethane. The aqueous layer ( $\approx 2.1$  mL) was collected, and a 20  $\mu\text{L}$  solution of  $\text{Ti}^{\text{IV}}(\text{O})\text{SO}_4$  was added to this aqueous layer. The absorbance at 407 nm was measured by UV-visible spectroscopy.

The absorbance at 407 nm was analyzed with (red trace) and without (black trace)  $\text{Ti}^{\text{IV}}(\text{O})\text{SO}_4$  (cf. Figure S9). The concentrations of  $\text{H}_2\text{O}_2$  in different catalytic reaction mixtures were calculated from the slope of the calibration curve (cf. Figure S8a,  $y = 0.7415x + 0.0044$ ) as follows:

$$1) \Delta\text{Abs} = \text{Abs}@407 \text{ nm (Figure S9, red trace)} - \text{Abs}@407 \text{ nm (Figure S9, black trace)}$$

$$2) [\text{H}_2\text{O}_2]_{\text{exp}} (\text{mM}) = (\Delta\text{Abs} - 0.0044)/0.7415$$

$$3) \text{For a } 2\text{e}^-/2\text{H}^+ \text{ catalytic } \text{O}_2 \text{ reduction reaction (Fc}^* \text{ is 1 mM for all catalytic reactions):}$$

$$[\text{H}_2\text{O}_2] = 0.5 \text{ mM} \times (0.5 \text{ mL (aliquot)}/2.1 \text{ mL (aqueous layer)}) = 0.120 \text{ mM}$$

$$4) \text{Selectivity of } \text{H}_2\text{O}_2 (\%) = [\text{H}_2\text{O}_2]_{\text{exp}}/0.120 \text{ mM}$$

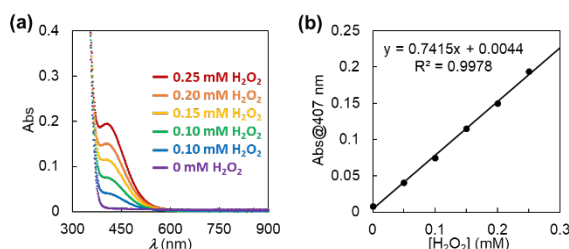

**Figure S8.** (a) UV-visible spectra for  $\text{Ti}^{\text{IV}}(\text{O})\text{SO}_4$ -based detection of varying (0–0.25 mM) concentrations of  $\text{H}_2\text{O}_2$ . (b) Calibration curve constructed from data in Figure S8a.

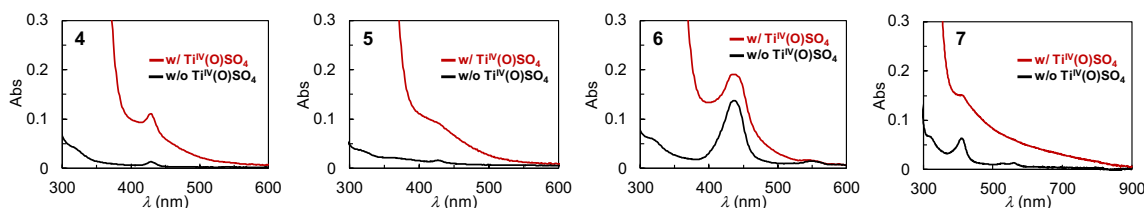

**Figure S9.** UV-visible spectra for the detection of  $\text{H}_2\text{O}_2$  from  $\text{O}_2$  reduction catalyzed with 4–7 via treatment with  $\text{Ti}^{\text{IV}}(\text{O})\text{SO}_4$  (red trace) and background spectra without adding  $\text{Ti}^{\text{IV}}(\text{O})\text{SO}_4$ . The selectivity for catalytic  $\text{O}_2$  reduction by 4–7: 4, 95 %; 5, 97 %; 6, 95 %; 7, 95%.

## B. Iodometric titration for H<sub>2</sub>O<sub>2</sub> quantification

The second method for quantitation of H<sub>2</sub>O<sub>2</sub> produced was determined by titration with iodide ion, as described previously in the literature.<sup>15,16</sup> In an iodometric titration, the formation of I<sub>3</sub><sup>-</sup> and the consumption of H<sub>2</sub>O<sub>2</sub> follows a one-to-one ratio ( $2 \text{ NaI} + \text{H}_2\text{O}_2 \rightarrow \text{I}_2 + 2 \text{ NaOH}$ ,  $\text{NaI} + \text{I}_2 \rightarrow \text{NaI}_3$ ). The concentration of H<sub>2</sub>O<sub>2</sub> can be derived from the concentration of I<sub>3</sub><sup>-</sup> ( $\text{Abs}@361 \text{ nm} = \epsilon b[\text{I}_3^-]$ ). All iodometric titrations are conducted anaerobically to avoid the oxidation of I<sup>-</sup> to I<sub>3</sub><sup>-</sup> by O<sub>2</sub>.

To quantify H<sub>2</sub>O<sub>2</sub> in the catalytic reaction mixture, a 60  $\mu\text{L}$  aliquot of the 3 mL catalytic reaction mixture was diluted in CH<sub>3</sub>CN (2.94 mL), and an excess amount of NaI (0.1 M) was then added. The amount of I<sub>3</sub><sup>-</sup> formed was determined by the UV-visible absorption spectroscopy ( $\lambda_{\text{max}}@361 \text{ nm}$ ,  $\epsilon = 2.8 \times 10^4 \text{ M}^{-1} \text{ cm}^{-1}$ ).<sup>15</sup> The absorbance at 361 nm was compared from aliquots withdrawn and analyzed with and without added NaI (red and black traces, respectively, in Figure S10). The difference in the absorbance at 361 nm was used to quantify the amount of H<sub>2</sub>O<sub>2</sub> formed in the catalytic reaction, according to the following considerations:

(1) For a  $2\text{e}^-/2\text{H}^+$  catalytic O<sub>2</sub> reduction:

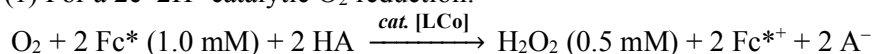

(2) The diluted CH<sub>3</sub>CN solution of the product mixture contains the following theoretical amount of hydrogen peroxide:  $[\text{H}_2\text{O}_2] (\text{mM}) = (60 \mu\text{L}/3000 \mu\text{L}) \times 0.5 \text{ mM} = 0.01 \text{ mM}$ .

(3)  $\text{Abs}@361 \text{ nm} (\text{red trace, Fig. S10}) - \text{Abs}@361 \text{ nm} (\text{black trace, Fig. S10}) = \epsilon b[\text{I}_3^-]$ ,  $[\text{I}_3^-] = [\text{H}_2\text{O}_2]_{\text{exp}}$

(4) Selectivity of H<sub>2</sub>O<sub>2</sub> (%) =  $[\text{H}_2\text{O}_2]_{\text{exp}}/0.01 \text{ mM}$

Two control experiments were conducted:

NaI (0.1 M) and Fc<sup>\*+</sup> (1 mM) were combined in the presence of 10 mM each of HClO<sub>4</sub> and [NBu<sub>4</sub>][ClO<sub>4</sub>] in DMF anaerobically. The mixture was analyzed by UV-visible spectroscopy (300-900 nm) anaerobically for 60 min. No reaction was observed (i.e., no change in the Fc<sup>\*+</sup> concentration in the absence of **6**).

NaI (0.1 M) was combined with catalytic amount of **6** (10  $\mu\text{M}$ ) in the presence of 10 mM each of HClO<sub>4</sub> and [NBu<sub>4</sub>][ClO<sub>4</sub>] in DMF anaerobically. The mixture was analyzed by UV-visible spectroscopy (300-900 nm) anaerobically for 60 min, and no reaction was observed (i.e., no catalytic oxidation of I<sup>-</sup> by **6**).

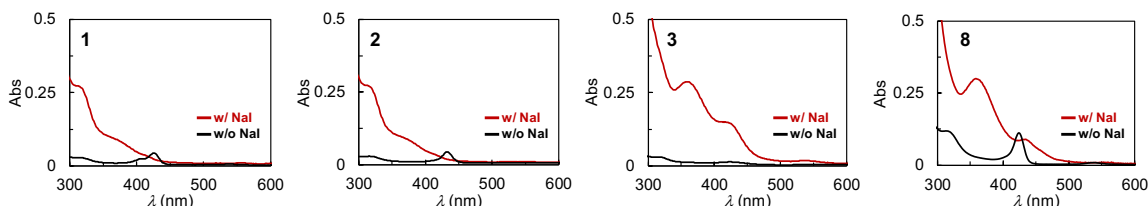

**Figure S10.** UV-Vis absorption spectral change before (black) and after (red) the addition of NaI (excess, 0.1 M) to a diluted reaction mixture in MeCN. The selectivity for catalytic O<sub>2</sub> reduction to H<sub>2</sub>O by **1–3, 8**: **1**, 98 %; **2**, 93 %; **3**, 98 %; **8**, 97%.

**Table S5.** A summary of selectivity for O<sub>2</sub> reduction catalyzed by **1–8**

| Co(por)                         | <b>1</b> | <b>2</b> | <b>3</b> | <b>4</b> | <b>5</b> | <b>6</b> | <b>7</b> | <b>8</b> |
|---------------------------------|----------|----------|----------|----------|----------|----------|----------|----------|
| % H <sub>2</sub> O <sub>2</sub> | 98 %     | 93 %     | 98 %     | 95 %     | 97 %     | 95 %     | 95 %     | 97 %     |

## VII. Turnover frequencies and effective overpotentials for Co(por), Co(N<sub>2</sub>O<sub>2</sub>), and Fe(por)

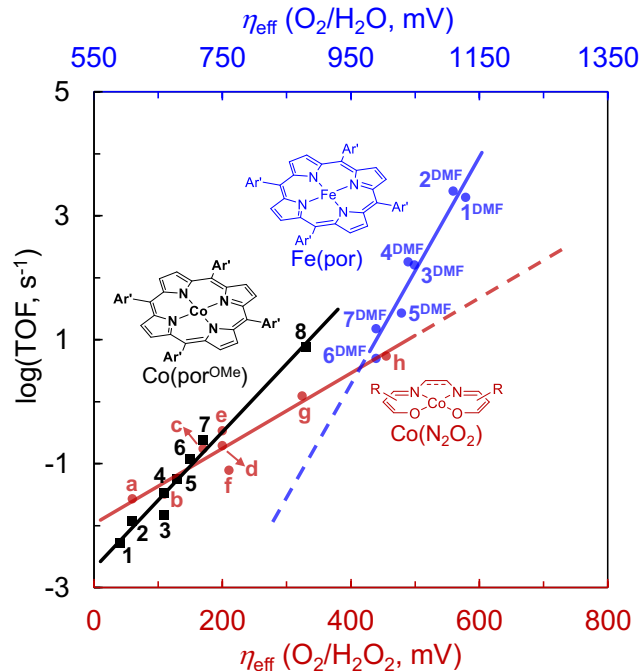

**Figure S11.** Linear free energy relationships that correlate  $\log(\text{TOF})$  and  $\eta_{\text{eff}}$  for the O<sub>2</sub> reduction to H<sub>2</sub>O or H<sub>2</sub>O<sub>2</sub>, catalyzed by Co(por), Co(N<sub>2</sub>O<sub>2</sub>) (red),<sup>17</sup> and Fe(por) (blue).<sup>18</sup>

**Chart S2.** Molecular Co(N<sub>2</sub>O<sub>2</sub>) complexes **a–h** for catalytic O<sub>2</sub> reduction<sup>17</sup>

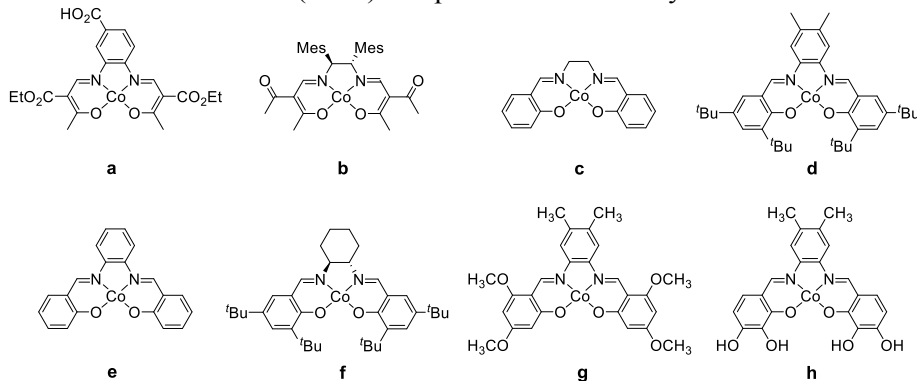

For the O<sub>2</sub> reduction catalyzed by Co(N<sub>2</sub>O<sub>2</sub>) complexes, the thermodynamic reduction potential of  $E_{\text{O}_2/\text{H}_2\text{O}_2}$  under standard state conditions (i.e., 1 M H<sub>2</sub>O<sub>2</sub>) is calculated to be 0.37 V versus  $\text{Fc}^{*+/0}$ , which is used to calculate the effective overpotentials of O<sub>2</sub> reduction catalyzed by **a–h** in this study.<sup>17</sup>

**Chart S3.** Molecular Fe(por) complexes for catalytic O<sub>2</sub> reduction<sup>18</sup>

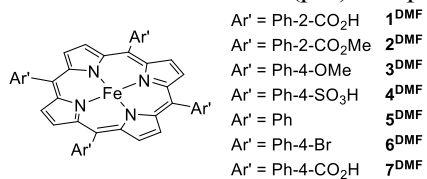

For the O<sub>2</sub> reduction catalyzed by Fe(por) complexes, the thermodynamic reduction potential of  $E_{\text{O}_2/\text{H}_2\text{O}}$  under standard state conditions (i.e., 1 M H<sub>2</sub>O) is calculated to be 0.50 V versus  $\text{Fc}^{+/0}$  using the Nernst equation as below:

$$E_{\text{O}_2/\text{H}_2\text{O}} \text{ vs. } \text{Fc}^{+/0} (\text{V}) = 0.55 \text{ V} - 0.030 \text{ V} \times \log([\text{H}_2\text{O}]_{1 \text{ M}}/[\text{H}_2\text{O}]_{20 \text{ mM}}) = 0.50 \text{ V}$$

This potential is used to calculate the effective overpotentials of O<sub>2</sub> reduction catalyzed by **1**<sup>DMF</sup>–**7**<sup>DMF</sup> in this study (i.e., Figures 2 and 5 in the main manuscript).<sup>18</sup>

**Table S6.** Turnover Frequencies (TOF, s<sup>-1</sup>) and Effective Overpotentials ( $\eta_{\text{eff}}$ , V) of O<sub>2</sub> Reduction Catalyzed with Co(por), Co(N<sub>2</sub>O<sub>2</sub>), and Fe(por).

| Co(por) <sup>a</sup> | TOF (s <sup>-1</sup> ) | $\eta_{\text{eff}}$ (V) <sup>d</sup> | Co(N <sub>2</sub> O <sub>2</sub> ) <sup>b</sup> | TOF (s <sup>-1</sup> ) | $\eta_{\text{eff}}$ (V) <sup>d</sup> | Fe(por) <sup>c</sup>    | TOF (s <sup>-1</sup> ) | $\eta_{\text{eff}}$ (V) <sup>e</sup> |
|----------------------|------------------------|--------------------------------------|-------------------------------------------------|------------------------|--------------------------------------|-------------------------|------------------------|--------------------------------------|
| <b>1</b>             | 0.0052                 | 0.04                                 | <b>a</b>                                        | 0.027                  | 0.06                                 | <b>1</b> <sup>DMF</sup> | 2000                   | 1.13                                 |
| <b>2</b>             | 0.012                  | 0.06                                 | <b>b</b>                                        | 0.032                  | 0.11                                 | <b>2</b> <sup>DMF</sup> | 2500                   | 1.11                                 |
| <b>3</b>             | 0.015                  | 0.11                                 | <b>c</b>                                        | 0.17                   | 0.17                                 | <b>3</b> <sup>DMF</sup> | 160                    | 1.05                                 |
| <b>4</b>             | 0.034                  | 0.11                                 | <b>d</b>                                        | 0.21                   | 0.20                                 | <b>4</b> <sup>DMF</sup> | 180                    | 1.04                                 |
| <b>5</b>             | 0.056                  | 0.13                                 | <b>e</b>                                        | 0.34                   | 0.20                                 | <b>5</b> <sup>DMF</sup> | 27                     | 1.03                                 |
| <b>6</b>             | 0.12                   | 0.15                                 | <b>f</b>                                        | 0.079                  | 0.21                                 | <b>6</b> <sup>DMF</sup> | 5                      | 0.99                                 |
| <b>7</b>             | 0.24                   | 0.17                                 | <b>g</b>                                        | 1.1                    | 0.32                                 | <b>7</b> <sup>DMF</sup> | 15                     | 0.99                                 |
| <b>8</b>             | 7.5                    | 0.33                                 | <b>h</b>                                        | 5.5                    | 0.46                                 |                         |                        |                                      |

<sup>a</sup>This study. <sup>b</sup>See ref. 17 for experimental details. <sup>c</sup>See ref. 18 for experimental details. <sup>d</sup>The effective overpotentials were calculated assuming standard state conditions (i.e., 1 M H<sub>2</sub>O<sub>2</sub>). <sup>e</sup>The effective overpotentials were calculated assuming standard state conditions (i.e., 1 M H<sub>2</sub>O).



## VIII. Turnover frequencies of previous O<sub>2</sub> reduction studies

### A. Calculation of turnover frequencies for chemical O<sub>2</sub> reduction

For the chemical reduction of O<sub>2</sub> reactions studied by UV-vis spectroscopy, the TOFs are calculated in the same manner as the Section V. Initial rates, in units of mM·s<sup>-1</sup>, were obtained by fitting UV-visible time-course data with linear regression during the first ~5% of the reaction for each of original reference. The turnover frequencies (TOFs, s<sup>-1</sup>) were then determined by dividing the number of electron transferred to account for the conversion of O<sub>2</sub> to H<sub>2</sub>O<sub>2</sub> on the basis of consumption of single-electron reductant (ferrocene derivatives) and the catalyst concentration ( $\text{TOF (s}^{-1}) = \frac{\Delta[\text{Fc}^*]/2}{[\text{Co}] \times \text{time}}$ , see also Section V).<sup>2-6,19</sup>

**Table S7.** A summary of turnover frequencies for previous chemical O<sub>2</sub> reduction studies

| Co                     | Initial time for estimating TOF | TOF (s <sup>-1</sup> ) <sup>a</sup> | Rate Law                               | Reference                              |
|------------------------|---------------------------------|-------------------------------------|----------------------------------------|----------------------------------------|
| Co(TPP)                | 4.2 ms                          | 4500                                | $k[\text{Co}][\text{Fc}]$              | <sup>2</sup><br>(Fig. 2 in ref. 2)     |
| Co(OEP)                | 0.5 s                           | 170                                 | $k[\text{Co}][\text{Fc}]$              | <sup>3, 4</sup><br>(Fig. 1a in ref. 3) |
| Co(Ph <sub>8</sub> Pc) | 50 s                            | 0.5<br>(Me <sub>2</sub> Fc)         | $k[\text{Co}][\text{H}^+][\text{O}_2]$ | <sup>19</sup><br>(Fig. S7 in ref. 19)  |
| Co(Ch <sub>1</sub> )   | 83 s                            | 250                                 | $k[\text{Co}][\text{H}^+][\text{O}_2]$ | <sup>5, 6</sup><br>(Fig. S6 in ref. 6) |
| Co(Ch <sub>2</sub> )   | 55 s                            | 380                                 | $k[\text{Co}][\text{H}^+][\text{O}_2]$ | <sup>6</sup><br>(Fig. S6 in ref. 6)    |
| Co(Ch <sub>3</sub> )   | 17 s                            | 1200                                | $k[\text{Co}][\text{H}^+][\text{O}_2]$ | <sup>6</sup><br>(Fig. S6 in ref. 6)    |

<sup>a</sup>TOFs were calculated based on the initial consumption of ferrocene derivatives by catalyst concentration per second ( $\text{TOF (s}^{-1}) = -1/2 \times [\text{Fc}']/([\text{Co}] \times \text{time})$ ).

### B. Calculation of turnover frequencies for electrochemical O<sub>2</sub> reduction

1. For the electrochemical reduction of O<sub>2</sub> reactions studied by cyclic voltammetry (CV), the TOFs ( $k_{\text{obs}}$ , s<sup>-1</sup>) are calculated according to eq S1. In equation S1,  $i_c$  is the catalytic current in the presence of catalysis,  $i_p$  is the catalytic current in the absence of catalysis,  $n_c$  (2) is the number of electrons transferred in the catalytic wave,  $n_p$  (1) is the number of electrons transferred in the non-catalytic wave,  $F$  is Faraday's constant ( $F = 96500 \text{ C mol}^{-1}$ ),  $\nu$  is the scan rate in V/s<sup>-1</sup>.<sup>20-28</sup>

$$\frac{i_c}{i_p} = \frac{n_c}{0.447n_p^{3/2}} \sqrt{\frac{RTk_{\text{obs}}}{F\nu}} \quad (\text{eq S1})$$

2. For the electrochemical reduction of O<sub>2</sub> reactions studied by rotating disk electrochemistry (RDE), the TOFs ( $k_{\text{obs}}$ , s<sup>-1</sup>) are calculated according to eq S2. In equation S2,  $i_{\text{pl}}$  is the catalytic plateau current,  $n_c$  (2) is the number of electrons transferred in the catalytic wave,  $F$  is Faraday's constant ( $F = 96500 \text{ C mol}^{-1}$ ),  $A$  is the surface area of the disk electrode,  $C_{\text{cat}}$  is the catalyst concentration,  $D_{\text{cat}}$  is the diffusion constant of the catalyst.<sup>20-28</sup>

$$i_{\text{pl}} = n_c F A C_{\text{cat}} \sqrt{D_{\text{cat}} k_{\text{obs}}} \quad (\text{eq S2})$$

**Table S8.** A summary of turnover frequencies for previous electrochemical O<sub>2</sub> reduction studies

| Co                          | $i_c$ ( $\mu\text{A}$ ) <sup>a</sup> | $i_p$ ( $\mu\text{A}$ ) <sup>b</sup> | Technique | TOF ( $\text{s}^{-1}$ ) | Reference                      |
|-----------------------------|--------------------------------------|--------------------------------------|-----------|-------------------------|--------------------------------|
| Co([14]aneN <sub>4</sub> )  | 475 <sup>c</sup>                     | –                                    | RDE       | 2.5                     | 29<br>(Fig. 3 in ref. 29)      |
| Co(TMPyMeP)                 | 64                                   | 2                                    | CV        | 36                      | 30<br>(Fig. 5 in ref. 30)      |
| Co(hmc)                     | 33                                   | 19                                   | CV        | 0.29                    | 31<br>(Fig. 7 in ref. 31)      |
| Co(Br <sub>8</sub> TMPyMeP) | 35                                   | 2                                    | CV        | 59<br>(pH 1.2)          | 32<br>(Figs. 2, 3 in ref. 32)  |
| Co(Br <sub>8</sub> TMPyMeP) | 30                                   | 2                                    | CV        | 44<br>(pH 7)            | 32<br>(Figs. 2, 3 in ref. 32)  |
| Co(Br <sub>8</sub> TPPS)    | 21                                   | 2                                    | CV        | 21                      | 33<br>(Figs. 2, 3 in ref. 33)  |
| Co(TMPyP)                   | 68                                   | 10                                   | CV        | 4.5                     | 34<br>(Figs. 2c, 5 in ref. 34) |

<sup>a</sup> $i_c$ : catalytic current. <sup>b</sup> $i_p$ : non-catalytic current. <sup>c</sup> $i_{pl}$ : catalytic plateau current.

3. The TOF of Co(TMPyMeP) was estimated using the CVs presented in Ref. 30, Figure 5. The catalytic CV does not exhibit ideal S-shaped electrocatalytic behavior with a plateau (the current is limited by diffusion). Therefore, the calculated catalytic TOF represents a lower limit. The  $i_c$  and  $i_p$  were estimated to be 64  $\mu\text{A}$  and 2  $\mu\text{A}$ , respectively, according to the scale bar in Figure S12. The turnover frequency was therefore calculated to be 36  $\text{s}^{-1}$  using the equation S1.

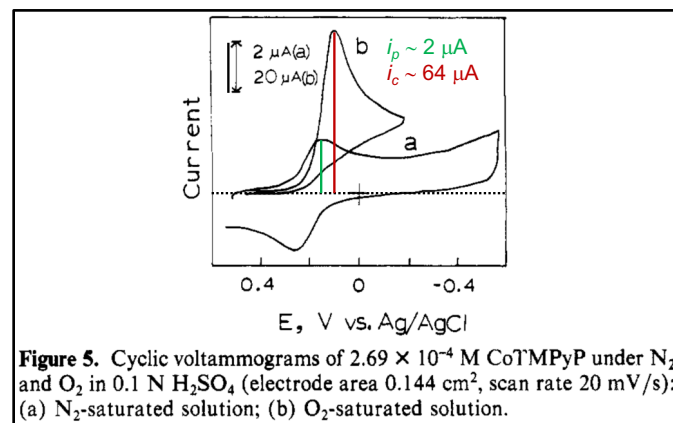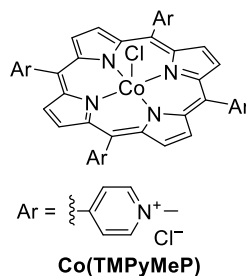

**Figure S12.** The cyclic voltammograms used to estimate the TOF of electrochemical O<sub>2</sub> reduction catalyzed by Co(TMPyMeP). Figure S12 is reproduced from Figure 5 of ref. 30; copyright 1985 American Chemical Society.)

4. The TOF of  $\text{Co}([\text{14}] \text{aneN}_4)$  was estimated using the rotating disk voltammogram (RDV) presented in Ref. 29, Figure 3. The  $i_{\text{pl}}$  was estimated to be  $475 \mu\text{A}$  according to the scale bar in Figure S13. The turnover frequency was therefore calculated to be  $2.5 \text{ s}^{-1}$  using the equation S2.

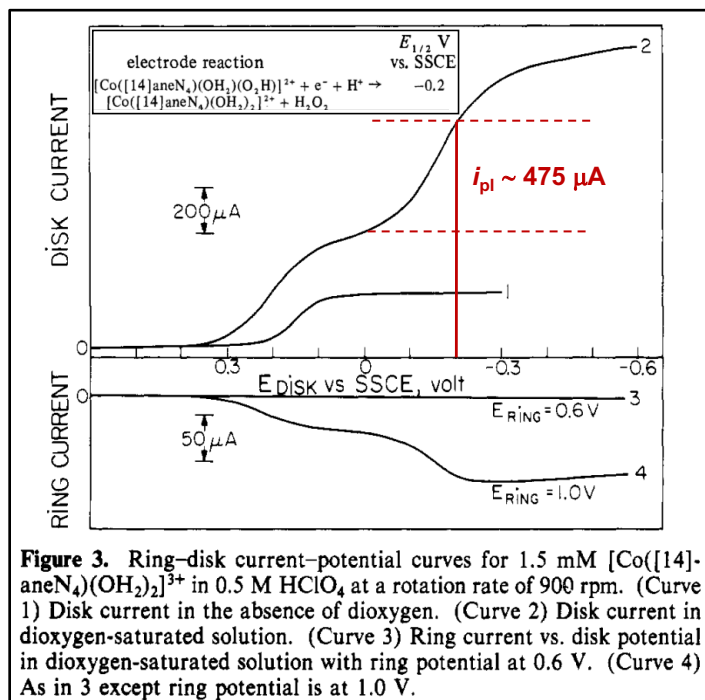

**Figure S13.** The RDV used to estimate the TOF of electrochemical  $\text{O}_2$  reduction catalyzed by  $\text{Co}([\text{14}] \text{aneN}_4)$ . Figure S13 is reproduced from Figure 3 in ref. 29; copyright 1981 American Chemical Society.)

## IX. Effective overpotentials of previous O<sub>2</sub> reduction studies

### A. Estimation of effective overpotentials for chemical O<sub>2</sub> reduction

For the O<sub>2</sub> reduction conducted in organic solutions, the thermodynamic reduction potentials of O<sub>2</sub>/H<sub>2</sub>O<sub>2</sub> were initially estimated via the OCP measurements of  $E_{\text{H}^+/\text{H}_2}$  (Sections I-II). The background concentration of H<sub>2</sub>O<sub>2</sub> is assumed to be at standard state condition (i.e., 1 M) for each reaction due to the lack of adding known amount of H<sub>2</sub>O<sub>2</sub> for the previous O<sub>2</sub> reduction studies. This assumption is necessary to estimate the effective overpotential and provide the basis to construct the linear free energy relationship between the log(TOF) and the  $\eta_{\text{eff}}$  (cf. Figure 6 in the main manuscript).

**Table S9.** A summary of effective overpotentials for previous chemical O<sub>2</sub> reduction studies

| Co                     | $E_{1/2}(\text{Co}^{\text{III/II}})$ ,<br>mV <sup>a</sup> | $E(\text{O}_2/\text{H}_2\text{O}_2)$ ,<br>mV <sup>a</sup> | $\eta_{\text{eff}}(\text{O}_2/\text{H}_2\text{O}_2)$ ,<br>mV <sup>a,b</sup> | Reference                   |
|------------------------|-----------------------------------------------------------|-----------------------------------------------------------|-----------------------------------------------------------------------------|-----------------------------|
| Co(TPP)                | 430                                                       | 990                                                       | 560                                                                         | 2<br>(Table I in ref. 2)    |
| Co(OEP)                | 390                                                       | 970                                                       | 580                                                                         | 3, 4<br>(Fig. 4 in ref. 3)  |
| Co(Ph <sub>8</sub> Pc) | 580                                                       | * <sub>c</sub>                                            | * <sub>c</sub>                                                              | 19<br>(Scheme 3 in ref. 19) |
| Co(Ch <sub>1</sub> )   | 560                                                       | 990                                                       | 430                                                                         | 5, 6<br>(Fig. 4 in ref. 6)  |
| Co(Ch <sub>2</sub> )   | 530                                                       | 990                                                       | 460                                                                         | 6<br>(Fig. 4 in ref. 6)     |
| Co(Ch <sub>3</sub> )   | 480                                                       | 990                                                       | 510                                                                         | 6<br>(Fig. 4 in ref. 6)     |

<sup>a</sup>All half-wave potentials of Co catalysts ( $E_{1/2}(\text{Co}^{\text{III/II}})$ ) and reduction potentials of O<sub>2</sub>/H<sub>2</sub>O<sub>2</sub> ( $E(\text{O}_2/\text{H}_2\text{O}_2)$ ) are relative to  $\text{Fc}^{*+/0}$ . <sup>b</sup>All thermodynamic reduction potentials of O<sub>2</sub>/H<sub>2</sub>O<sub>2</sub> vs.  $\text{Fc}^{*+/0}$  were estimated via the OCP measurements. The background concentration of H<sub>2</sub>O<sub>2</sub> was assumed at standard-state conditions of 1 M for all studies to estimate  $\eta_{\text{eff}}$ . <sup>c</sup>Estimation of  $E_{\text{O}_2/\text{H}_2\text{O}_2}$  from OCP measurement of  $E_{\text{H}^+/\text{H}_2}$  was not possible because the reaction was conducted under non-buffered conditions.<sup>1</sup>

### B. Estimation of effective overpotentials for electrochemical O<sub>2</sub> reduction

For the O<sub>2</sub> reduction conducted in aqueous solutions, the thermodynamic reduction potentials of O<sub>2</sub>/H<sub>2</sub>O<sub>2</sub> were calculated using the Nernst equation (cf. eq S3). The background concentration of H<sub>2</sub>O<sub>2</sub> is assumed to be at standard state condition (1 M) for each reaction due to the lack of adding known amount of H<sub>2</sub>O<sub>2</sub> for the previous O<sub>2</sub> reduction studies. This assumption is necessary to estimate the effective overpotential and provide the basis to construct the linear free energy relationship between the log(TOF) and the  $\eta_{\text{eff}}$  (cf. Figure 5 in the main manuscript).

$$E_{\text{O}_2/\text{H}_2\text{O}_2(\text{aq})} \text{ vs. NHE} = 0.68 \text{ V} - 0.059 \text{ V} \times \text{pH} \quad (\text{eq S3})$$

**Table S10.** A summary of effective overpotentials for previous electrochemical O<sub>2</sub> reduction studies

| Co                          | pH value | $E_{1/2}$ ,<br>mV <sup>a</sup> | $E(\text{O}_2/\text{H}_2\text{O}_2)$ ,<br>mV <sup>a</sup> | $\eta_{\text{eff}}(\text{O}_2/\text{H}_2\text{O}_2)$ ,<br>mV <sup>a,b</sup> | Reference                      |
|-----------------------------|----------|--------------------------------|-----------------------------------------------------------|-----------------------------------------------------------------------------|--------------------------------|
| Co([14]aneN <sub>4</sub> )  | 0.3      | 400 <sup>d</sup>               | 660                                                       | 260                                                                         | 29<br>(Fig. 1 in ref. 29)      |
| Co(TMPyMeP)                 | 1.2      | 420 <sup>d</sup>               | 610                                                       | 190                                                                         | 30<br>(Figs. 1, 5 in ref. 30)  |
| Co(hmc)                     | 2.9      | 360 <sup>d</sup>               | 510                                                       | 150                                                                         | 31<br>(Fig. 7 in ref. 31)      |
| Co(Br <sub>8</sub> TMPyMeP) | 1.2      | −56 <sup>e</sup>               | 610                                                       | 666                                                                         | 32<br>(Figs. 2, 3 in ref. 32)  |
| Co(Br <sub>8</sub> TMPyMeP) | 7.0      | −66 <sup>e</sup>               | 267                                                       | 333                                                                         | 32<br>(Figs. 2, 3 in ref. 32)  |
| Co(Br <sub>8</sub> TPPS)    | 8.9      | −390 <sup>e</sup>              | 155                                                       | 545                                                                         | 33<br>(Figs. 2, 3 in ref. 33)  |
| Co(TMPyP)                   | 1.0      | 350 <sup>d</sup>               | 620                                                       | 270                                                                         | 34<br>(Figs. 2c, 5 in ref. 34) |

<sup>a</sup>All half-wave potentials of Co catalysts ( $E_{1/2}$ ) and reduction potentials of O<sub>2</sub>/H<sub>2</sub>O<sub>2</sub> ( $E(\text{O}_2/\text{H}_2\text{O}_2)$ ) are relative to NHE.

<sup>b</sup>All thermodynamic reduction potentials of O<sub>2</sub>/H<sub>2</sub>O<sub>2</sub> vs. NHE were estimated via the Nernst equation:  $E(\text{O}_2/\text{H}_2\text{O}_2) = 0.68 \text{ V} - 0.059 \text{ V} \times \text{pH}$ . The background concentration of H<sub>2</sub>O<sub>2</sub> was assumed at standard-state conditions of 1 M for all studies to estimate  $\eta_{\text{eff}}$ . <sup>d</sup>Half-wave potentials of the Co<sup>III</sup>/Co<sup>II</sup> redox couple. <sup>e</sup>Half-wave potentials of the Co<sup>II</sup>/Co<sup>I</sup> redox couple.

## X. Relationship between $\log(\text{TOF})$ and $E_{1/2}(\text{Co})$

Relationship between the logarithm of turnover frequency,  $\log(\text{TOF})$ , and the half-wave potential of cobalt complexes,  $E_{1/2}(\text{Co})$  is presented in Figure S12. The  $\log(\text{TOF})$  and  $E_{1/2}(\text{Co})$  values were taken from the Sections VIII and IX, respectively.

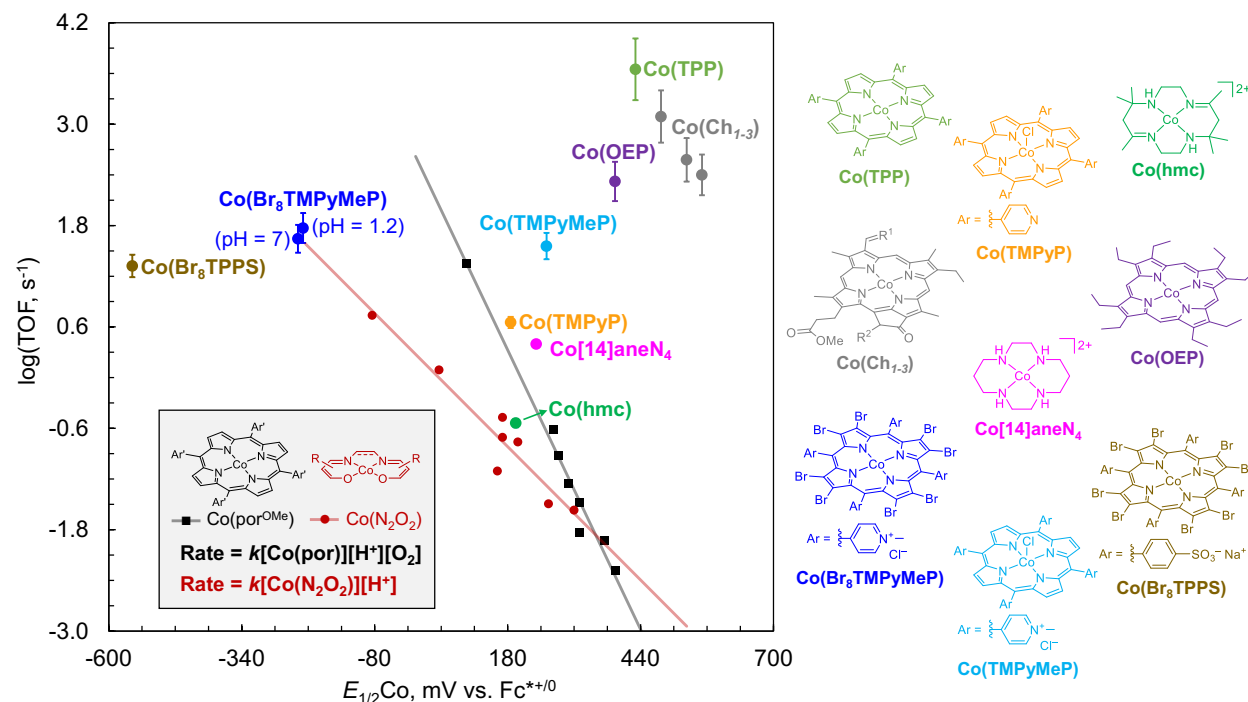

**Figure S14.** Dependence of  $\log(\text{TOF})$  versus  $E_{1/2}(\text{Co})$  for  $2e^-/2H^+$  reduction of  $O_2$  to  $H_2O_2$ . The  $\text{Co}(\text{por})$  data (black trace) is from this study, and the  $\text{Co}(\text{N}_2\text{O}_2)$  data (red trace) was taken from Figure 5 in ref. 17. The error bar for  $\log(\text{TOF})$  is estimated to be about  $\pm 5\%$ .

## XI. References

1. Roberts, J. A. S.; Bullock, R. M. Direct Determination of Equilibrium Potentials for Hydrogen Oxidation/Production by Open Circuit Potential Measurements in Acetonitrile. *Inorg. Chem.* **2013**, *52*, 3823-3835.
2. Fukuzumi, S.; Mochizuki, S.; Tanaka, T. Efficient Reduction of Dioxygen with Ferrocene Derivatives, Catalyzed by Metalloporphyrins in the Presence of Perchloric Acid. *Inorg. Chem.* **1989**, *28*, 2459-2465.
3. Fukuzumi, S.; Okamoto, K.; Gros, C. P.; Guillard, R. Mechanism of Four-Electron Reduction of Dioxygen to Water by Ferrocene Derivatives in the Presence of Perchloric Acid in Benzonitrile, Catalyzed by Cofacial Dicobalt Porphyrins. *J. Am. Chem. Soc.* **2004**, *126*, 10441-10449.
4. Fukuzumi, S. Metal Ion-Coupled Electron-Transfer Reduction of Dioxygen. *Chem. Lett.* **2008**, *37*, 808-813.
5. Mase, K.; Ohkubo, K.; Fukuzumi, S. Efficient Two-Electron Reduction of Dioxygen to Hydrogen Peroxide with One-Electron Reductants with a Small Overpotential Catalyzed by a Cobalt Chlorin Complex. *J. Am. Chem. Soc.* **2013**, *135*, 2800-2808.
6. Mase, K.; Ohkubo, K.; Fukuzumi, S. Much Enhanced Catalytic Reactivity of Cobalt Chlorin Derivatives on Two-Electron Reduction of Dioxygen to Produce Hydrogen Peroxide. *Inorg. Chem.* **2015**, *54*, 1808-1815.
7. Pegis, M. L.; Roberts, J. A. S.; Wasylenko, D. J.; Mader, E. A.; Appel, A. M.; Mayer, J. M. Standard Reduction Potentials for Oxygen and Carbon Dioxide Couples in Acetonitrile and *N,N*-Dimethylformamide. *Inorg. Chem.* **2015**, *54*, 11883-11888.
8. Marenich, A. V.; Cramer, C. J.; Truhlar, D. G. Universal Solvation Model Based on Solute Electron Density and on a Continuum Model of the Solvent Defined by the Bulk Dielectric Constant and Atomic Surface Tensions. *J. Phys. Chem. B* **2009**, *113*, 6378-6396.
9. Marenich, A. V.; Kelly, C. P.; Thompson, J. D.; Hawkins, G. D.; Chambers, C. C.; Giesen, D. J.; Winget, P.; Cramer, C. J.; Truhlar, D. G., *Minnesota Solvation Database – version 2012*. University of Minnesota: Minneapolis, 2012.
10. Wang, Y.-H.; Schneider, P. E.; Goldsmith, Z. K.; Mondal, B.; Hammes-Schiffer, S.; Stahl, S. S. Brønsted Acid Scaling Relationships Enable Control Over Product Selectivity from O<sub>2</sub> Reduction with a Mononuclear Cobalt Porphyrin Catalyst. *ACS Cent. Sci.* **2019**, *5*, 1024-1034.
11. Sato, T.; Hamada, Y.; Sumikawa, M.; Araki, S.; Yamamoto, H. Solubility of Oxygen in Organic Solvents and Calculation of the Hansen Solubility Parameters of Oxygen. *Ind. Eng. Chem. Res.* **2014**, *53*, 19331-19337.
12. Su, B.; Hatay, I.; Ge, P. Y.; Mendez, M.; Corminboeuf, C.; Samec, Z.; Ersoz, M.; Girault, H. H. Oxygen and Proton Reduction by Decamethylferrocene in Non-Aqueous Acidic Media. *Chem. Commun.* **2010**, *46*, 2918-2919.
13. (a) Lee, Y.; Park, G. Y.; Lucas, H. R.; Vajda, P. L.; Kamaraj, K.; Vance, M. A.; Milligan, A. E.; Woertink, J. S.; Siegler, M. A.; Narducci Sarjeant, A. A.; Zakharov, L. N.; Rheingold, A. L.; Solomon, E. I.; Karlin, K. D. Copper(I)/O<sub>2</sub> Chemistry with Imidazole Containing Tripodal Tetradentate Ligands Leading to  $\mu$ -1,2-Peroxo-Dicopper(II) Species. *Inorg. Chem.* **2009**, *48*, 11297-11309.
14. Anson, C. W.; Stahl, S. S. Cooperative Electrocatalytic O<sub>2</sub> Reduction Involving Co(salophen) with *p*-Hydroquinone as an Electron-Proton Transfer Mediator. *J. Am. Chem. Soc.* **2017**, *139*, 18472-18475.
15. Mair, R. D.; Graupner, A. J. Determination of Organic Peroxides by Iodine Liberation Procedures. *Anal. Chem.* **1964**, *36*, 194-204.
16. Fukuzumi, S.; Kuroda, S.; Tanaka, T. Flavin Analog-metal Ion Complexes Acting as Efficient Photocatalysts in the Oxidation of *p*-Methylbenzyl Alcohol by Oxygen under Irradiation with Visible Light. *J. Am. Chem. Soc.* **1985**, *107*, 3020-3027.
17. Wang, Y.-H.; Pegis, M. L.; Mayer, J. M.; Stahl, S. S. Molecular Cobalt Catalysts for O<sub>2</sub> Reduction: Low-Overpotential Production of H<sub>2</sub>O<sub>2</sub> and Comparison with Iron-Based Catalysts. *J. Am. Chem. Soc.* **2017**, *139*, 16458-16461.

- 
18. Pegis, M. L.; McKeown, B. A.; Kumar, N.; Lang, K.; Wasylenko, D. J.; Zhang, X. P.; Rauegi, S.; Mayer, J. M. Homogenous Electrocatalytic Oxygen Reduction Rates Correlate with Reaction Overpotential in Acidic Organic Solutions. *ACS Cent. Sci.* **2016**, *2*, 850-856.
  19. Honda, T.; Kojima, T.; Fukuzumi, S. Proton-Coupled Electron-Transfer Reduction of Dioxygen Catalyzed by a Saddle-Distorted Cobalt Phthalocyanine. *J. Am. Chem. Soc.* **2012**, *134*, 4196-4206.
  20. For calculation of turnover frequencies in molecular electrocatalysis studies (i.e., cyclic voltammetry, rotating disk electrochemistry), see the following and refs. 2120–28: Nicholson, R. S.; Shain, I. Theory of Stationary Electrode Polarography. Single Scan and Cyclic Methods Applied to Reversible, Irreversible, and Kinetic Systems. *Anal. Chem.* **1964**, *36*, 706-723.
  21. Saveant, J. M.; Vianello, E. Potential-sweep Chronoamperometry: Kinetic Currents for First-order Chemical Reaction Parallel to Electron-transfer Process (Catalytic Currents). *Electrochim. Acta* **1965**, *10*, 905-920.
  22. Nicholson, R. S.; Shain, I. Theory of Stationary Electrode Polarography for a Chemical Reaction Coupled between Two Charge Transfers. *Anal. Chem.* **1965**, *37*, 178-190.
  23. Savéant, J. M.; Vianello, E. Potential-sweep Voltammetry: General Theory of Chemical Polarization. *Electrochim. Acta* **1967**, *12*, 629-646.
  24. Andrieux, C. P.; Dumas-Bouchiat, J. M.; Savéant, J. M. Homogeneous Redox Catalysis of Electrochemical Reactions: Part IV. Kinetic Controls in the Homogeneous Process as Characterized by Stationary and Quasi-stationary Electrochemical Techniques. *J. Electroanal. Chem.* **1980**, *113*, 1-18.
  25. Bard, A. J.; Faulkner, L. R. *Electrochemical Methods: Fundamentals and Applications*. Wiley: New Jersey, 2001, pp 331-364.
  26. Savéant, J.-M. Molecular Catalysis of Electrochemical Reactions. Mechanistic Aspects. *Chem. Rev.* **2008**, *108*, 2348-2378.
  27. Rountree, E. S.; McCarthy, B. D.; Eisenhart, T. T.; Dempsey, J. L. Evaluation of Homogeneous Electrocatalysts by Cyclic Voltammetry. *Inorg. Chem.* **2014**, *53*, 9983-10002.
  28. Costentin, C.; Passard, G.; Savéant, J.-M. Benchmarking of Homogeneous Electrocatalysts: Overpotential, Turnover Frequency, Limiting Turnover Number. *J. Am. Chem. Soc.* **2015**, *137*, 5461-5467.
  29. Geiger, T.; Anson, F. C. Homogeneous Catalysis of the Electrochemical Reduction of Dioxygen by a Macrocyclic Cobalt(III) Complex. *J. Am. Chem. Soc.* **1981**, *103*, 7489-7496.
  30. Chan, R. J. H.; Su, Y. O.; Kuwana, T. Electrocatalysis of Oxygen Reduction. 5. Oxygen to Hydrogen Peroxide Conversion by Cobalt(II) Tetrakis(N-Methyl-4-Pyridyl)Porphyrin. *Inorg. Chem.* **1985**, *24*, 3777-3784.
  31. Kang, C.; Anson, F. C. Effects of Coordination to a Macrocyclic Cobalt Complex on the Electrochemistry of Dioxygen, Superoxide, and Hydroperoxide. *Inorg. Chem.* **1995**, *34*, 2771-2780.
  32. D'Souza, F.; Deviprasad, R. G.; Hsieh, Y.-Y. Synthesis and Studies on the Electrocatalytic Reduction of Molecular Oxygen by Non-planar Cobalt(II) Tetrakis-(N-methylpyridyl)- $\beta$ -Octabromoporphyrin. *J. Electroanal. Chem.* **1996**, *411*, 167-171.
  33. D'Souza, F.; Hsieh, Y.-Y.; Deviprasad, G. R. Electrocatalytic Reduction of Molecular Oxygen using Non-planar Cobalt Tetrakis-(4-Sulfonatophenyl)- $\beta$ -Octabromoporphyrin. *J. Electroanal. Chem.* **1997**, *426*, 17-21.
  34. He, Q.; Mugadza, T.; Hwang, G. S.; Nyokong, T. Mechanisms of Electrocatalysis of Oxygen Reduction by Metal Porphyrins in Trifluoromethane Sulfonic Acid Solution. *Int. J. Electrochem. Sci.* **2012**, *7*, 7045-7064.
